# Supplementary material for: Presynaptic morphology and vesicular composition determine vesicle dynamics in mouse central synapses
Source: eLife. 2017 Apr 22;6:e24845. doi: 10.7554/eLife.24845 (PMC5423771; doi:10.7554/eLife.24845)
Supplement: Figure 1—source data 1. — DOI: http://dx.doi.org/10.7554/eLife.24845.004 [file elife-24845-fig1-data1.xlsx]

## Sheet: Figure 1E
		Q655 (Auto)	Q585 (Auto)	C5E (Auto)	Q655 Fixed (Auto)	Beads	Brownian
	cc1	0.0454	0.0581	0.0469	0.0122	0.0075	0.0089
	cc2	0.067	0.0596	0.0581	0.0071	0.0056	0.0124
	cc3	0.0721	0.063	0.0765	0.0041	0.0074	0.0064
	cc4	0.0787	0.0551	0.0451	0.0082	0.0118	0.0148
	cc5	0.0571	0.0402	0.0612	0.0065	0.0031	0.0088
	cc6	0.0729	0.0701	0.0488	0.0121	0.0047	0.0081
	cc7	0.0544	0.0655	0.0696	0.0143	0.0062	0.0076
	cc8	0.0811	0.0396	0.0706	0.0087	0.0102	0.0055
	cc9	0.0328	0.0698	0.0748	0.0066	0.0128	0.0112
	cc10	0.0698	0.0506	0.0632	0.0063	0.0078	0.0095
	cc11	0.0684	0.0664	0.0773	0.0052	0.008	0.004
	cc12	0.0791	0.0695	0.06089	0.0091	0.0103	0.0161
	mean	0.0649	0.0589583	0.0627492	0.00836667	0.00795	0.00944167
	sd	0.0147487	0.0107865	0.0114398	0.0030929	0.00289404	0.00363304
	sem	0.00426264	0.00311748	0.00330629	0.000893903	0.000836427	0.00105001
	Q655 versus Q585, C5E, Q655 Fixed, Beads and Q655 (Brownian), Two-tailed unpaired t-test
	p		0.2627	0.6844	<0.0001	<0.0001	<0.0001
	t		1.1494	0.4119	13.1538	13.32	12.8549
	df		22	22	22	22	22
	sed		0.005	0.005	0.004	0.004	0.004
			ns	ns	***	***	***
	Diffusion coefficient analysis, Figure 1E (right panel)
