# Supplementary material for: Presynaptic morphology and vesicular composition determine vesicle dynamics in mouse central synapses
Source: eLife. 2017 Apr 22;6:e24845. doi: 10.7554/eLife.24845 (PMC5423771; doi:10.7554/eLife.24845)
Supplement: Figure 1—source data 2. — DOI: http://dx.doi.org/10.7554/eLife.24845.005 [file elife-24845-fig1-data2.xlsx]

## Sheet: Figure 1-S1B
		Q655	Q655-Syt2	C5E-Syt2
	cc1	107	1498	2042
	cc2	88	985	1469
	cc3	284	3616	918
	cc4	8	1956	3185
	cc5	36	1566	1690
	mean	104.6	1924.2	1860.8
	sd	107.823	1006.88	845.265
	sem	48.3511	451.517	379.043
	Q655 versus Q655-Syt2 and C5E-Syt2, Two-tailed unpaired t-test
	p		0.0039	0.0018
	t		4.0072	4.596
	df		8	8
	sed		454.081	382.11
			**	**
	Number of SVs, Figure 1-figure supplement 1B
