# Supplementary material for: Presynaptic morphology and vesicular composition determine vesicle dynamics in mouse central synapses
Source: eLife. 2017 Apr 22;6:e24845. doi: 10.7554/eLife.24845 (PMC5423771; doi:10.7554/eLife.24845)
Supplement: Figure 1—source data 3. — DOI: http://dx.doi.org/10.7554/eLife.24845.006 [file elife-24845-fig1-data3.xlsx]

## Sheet: Figure 1-S2D
	T1/2	Finger	Swelling		D (Axelrod)	Finger	Swelling		D (Kang)	Finger	Swelling
	cc1	4.8	12.5		cc1	0.0672	0.0258		cc1	0.075	0.0288
	cc2	7.2	11.8		cc2	0.07	0.0427		cc2	0.0781	0.0477
	cc3	6.9	15.5		cc3	0.0467	0.0208		cc3	0.0521	0.0232
	mean	6.3	13.2667		mean	0.0613	0.0297667		mean	0.0684	0.0332333
	sd	1.30767	1.96554		sd	0.0127212	0.0114762		sd	0.0142011	0.0128376
	sem	0.755878	1.13615		sem	0.00735332	0.00663365		sem	0.0082087	0.00742056
	FRAP analysis figner versus swelling, determination of D according to Axelrod et al. or Kang et al.
	Figure 1-figure supplement 2D
