# Supplementary material for: Presynaptic morphology and vesicular composition determine vesicle dynamics in mouse central synapses
Source: eLife. 2017 Apr 22;6:e24845. doi: 10.7554/eLife.24845 (PMC5423771; doi:10.7554/eLife.24845)
Supplement: Figure 1—source data 4. — DOI: http://dx.doi.org/10.7554/eLife.24845.007 [file elife-24845-fig1-data4.xlsx]

## Sheet: Figure-S3D
		Q655	Q585 (1h)	Q585 (2h)	Q585 (3h)
	cc1	0.0653	0.0478	0.0641	0.0551
	cc2	0.0598	0.0432	0.0491	0.0733
	cc3	0.0716	0.0455	0.0599	0.0696
	mean	0.0655667	0.0455	0.0577	0.066
	sd	0.00590452	0.0023	0.00773822	0.00961925
	sem	0.00341302	0.00132948	0.00447296	0.00556026
	Q655 versus Q585 incubation time, Two-tailed unpaired t-test
	p		0.0053	0.2333	0.9421
	t		5.4944	1.4027	0.0773
	df		4	4	4
	sed		0.004	0.006	0.006
			**	ns	ns
	Diffusion coefficient analysis, Figure 1-figure supplement 3D
