# Supplementary material for: Presynaptic morphology and vesicular composition determine vesicle dynamics in mouse central synapses
Source: eLife. 2017 Apr 22;6:e24845. doi: 10.7554/eLife.24845 (PMC5423771; doi:10.7554/eLife.24845)
Supplement: Figure 2—source data 1. — DOI: http://dx.doi.org/10.7554/eLife.24845.014 [file elife-24845-fig2-data1.xlsx]

## Sheet: Figure 2E
		Ctrl (37C)	Ctrl (25C)	OA (37C)
	cc1	0.0454	0.0522	0.116
	cc2	0.067	0.0453	0.1086
	cc3	0.0721	0.0376	0.062
	cc4	0.0787	0.0486	0.0975
	cc5	0.0571		0.0856
	cc6	0.0729		0.1094
	cc7	0.0544		0.0653
	cc8	0.0811		0.1233
	cc9	0.0328		0.0685
	cc10	0.0698
	cc11	0.0684
	cc12	0.0791
	mean	0.0649	0.045925	0.0929111
	sd	0.0147487	0.00622435	0.023353
	sem	0.00426264	0.00311217	0.00778432
	Control at 37C versus Control at 25C and Okadaic acid at 37C, Two-tailed unpaired t-test
	p		0.0259	0.003
	t		2.4908	3.4076
	df		14	19
	sed		0.008	0.008
			*	**
	Diffusion coefficient analysis, Figure 2E
