# Supplementary material for: Presynaptic morphology and vesicular composition determine vesicle dynamics in mouse central synapses
Source: eLife. 2017 Apr 22;6:e24845. doi: 10.7554/eLife.24845 (PMC5423771; doi:10.7554/eLife.24845)
Supplement: Figure 2—source data 2. — DOI: http://dx.doi.org/10.7554/eLife.24845.015 [file elife-24845-fig2-data2.xlsx]

## Sheet: Figure 2-S2E
		Ctrl (Finger)	OA (Finger)	Noco (Finger)	KCl (Finger)	Suc (Finger)	1 Hz (Finger)	Ctrl (Swelling)	OA (Swelling)	Noco (Swelling)	KCl (Swelling)	Suc (Swelling)	1 Hz (Swelling)
	cc1	0.0621	0.0852	0.0456	0.0601	0.0636	0.0599	0.0462	0.05612	0.0401	0.03103	0.0467	0.0431
	cc2	0.0651	0.0831	0.0422	0.0562	0.0481	0.0642	0.0251	0.0591	0.0512	0.0256	0.0441	0.0336
	cc3	0.0597	0.0801	0.0594	0.0644	0.0625	0.0496	0.0443	0.0463	0.0418	0.0308	0.0386	0.0489
	cc4	0.0601	0.0554	0.0298	0.0369	0.0618	0.0651	0.0468	0.0556	0.0319	0.0347	0.0398	0.0496
	cc5	0.0399	0.0857	0.0299	0.0488	0.0644	0.0465	0.0439	0.0592	0.0399	0.0233	0.0289	0.0341
	cc6	0.0676	0.0844	0.0521	0.0597	0.0439	0.0654	0.0423	0.0604	0.04	0.0423	0.0438	0.0482
	mean	0.0590833	0.0789833	0.0431667	0.05435	0.0573833	0.05845	0.0414333	0.05612	0.0408167	0.0312883	0.0403167	0.0429167
	sd	0.00987166	0.0117258	0.0118731	0.0100141	0.00896157	0.00835242	0.00816521	0.00516504	0.00616941	0.00677307	0.00633638	0.00738848
	sem	0.00402925	0.00525819	0.00484617	0.0040874	0.00365778	0.00374548	0.00333274	0.00210818	0.00251813	0.00303725	0.00258628	0.00301571
	Finger versus Swelling, Two-tailed unpaired t-test
	p		0.0126	0.0291	0.4255	0.7586	0.9145		0.0037	0.8876	0.0452	0.7959	0.7436
	t		3.0333	2.5447	0.8309	0.3159	0.1101		3.7581	0.1449	2.2871	0.2657	0.3363
	df		10	10	10	10	10		10	10	10	10	10
	sed		0.007	0.006	0.006	0.005	0.005		0.004	0.004	0.004	0.004	0.004
			*	*	ns	ns	ns		**	ns	*	ns	ns
	Diffusion coefficient analysis, Figure 2-figure supplement 2E

## Sheet: Figure 2-S2H
		2D (S)	3D (S)	2D (M)	3D (M)	2D (L)	3D (L)
	cc1	0.5353	0.6101	0.3054	0.2602	0.1593	0.1297
	cc2	0.6522	0.7303	0.2571	0.2031	0.0907	0.0666
	cc3	0.5942	0.6733	0.2832	0.2417	0.1226	0.085
	mean	0.5939	0.671233	0.2819	0.235	0.1242	0.0937667
	sd	0.0584506	0.0601266	0.0241762	0.0291337	0.034328	0.0324506
	sem	0.0337865	0.0347553	0.0139747	0.0168403	0.0198428	0.0187576
	2D versus 3D, Two-tailed unpaired t-test
	p		0.1853		0.0979		0.3255
	t		1.5981		2.1509		1.1199
	df		4		4		4
	sed		0.048		0.022		0.027
			ns		ns		ns
	Track ratio analysis, Figure 2-figure supplement 2H (left panel)
		2D	3D
	cc1	0.06226	0.06295
	cc2	0.05674	0.05807
	cc3	0.06779	0.06783
	mean	0.0622633	0.06295
	sd	0.005525	0.00488
	sem	0.00319364	0.00282081
	2D versus 3D, Two-tailed unpaired t-test
	p		0.8751
	t		0.1676
	df		4
	sed		0.004
			ns
	Diffusion coefficient analysis, Figure 2-figure supplement 2H (right panel)
