# Supplementary material for: Presynaptic morphology and vesicular composition determine vesicle dynamics in mouse central synapses
Source: eLife. 2017 Apr 22;6:e24845. doi: 10.7554/eLife.24845 (PMC5423771; doi:10.7554/eLife.24845)
Supplement: Figure 2—source data 3. — DOI: http://dx.doi.org/10.7554/eLife.24845.016 [file elife-24845-fig2-data3.xlsx]

## Sheet: Figure 2-S3B
		(S) 0.5s	(S) 1s	(S) 2s	(M) 0.5s	(M) 1s	(M) 2s	(L) 0.5s	(L) 1s	(L) 2s
	cc1	63.65	69.47	65.97	27.46	21.96	24.39	8.73	8.25	9.45
	cc2	59.34	62.07	63.58	25.55	25.07	25.22	14.92	12.85	11.19
	cc3	60.66	62.89	63.74	26.02	25.69	24.54	13.32	11.42	11.72
	mean	61.22	64.81	64.43	26.34	24.24	24.72	12.32	10.84	10.79
	sd	2.208	4.056	1.336	0.9952	1.999	0.4423	3.213	2.354	1.188
	sem	1.275	2.342	0.7714	0.5746	1.154	0.2554	1.855	1.359	0.6856
	Track ratio versus data acquisition rate, group analysis
	(S): 0.5s vs 1s vs 2s
	Two-way ANOVA	Ordinary
	Alpha	0.05
	Source of Variation	% of total variation	P value	P value summary	Significant?
	Row Factor	54.8	0.0306	*	Yes
	Column Factor	33.59	0.066	ns	No
	ANOVA table	SS	DF	MS	F (DFn, DFd)	P value
	Row Factor	38.15	2	19.07	F (2, 4) = 9.438	P = 0.0306
	Column Factor	23.38	2	11.69	F (2, 4) = 5.785	P = 0.0660
	Residual	8.084	4	2.021
	(M): 0.5s vs 1s vs 2s
	Two-way ANOVA	Ordinary
	Alpha	0.05
	Source of Variation	% of total variation	P value	P value summary	Significant?
	Row Factor	6.445	0.7924	ns	No
	Column Factor	41.32	0.3117	ns	No
	ANOVA table	SS	DF	MS	F (DFn, DFd)	P value
	Row Factor	1.138	2	0.569	F (2, 4) = 0.2468	P = 0.7924
	Column Factor	7.297	2	3.649	F (2, 4) = 1.582	P = 0.3117
	Residual	9.224	4	2.306
	(L): 0.5s vs 1s vs 2s
	Two-way ANOVA	Ordinary
	Alpha	0.05
	Source of Variation	% of total variation	P value	P value summary	Significant?
	Row Factor	74.95	0.023	*	Yes
	Column Factor	11.67	0.2854	ns	No
	ANOVA table	SS	DF	MS	F (DFn, DFd)	P value
	Row Factor	29.32	2	14.66	F (2, 4) = 11.20	P = 0.0230
	Column Factor	4.564	2	2.282	F (2, 4) = 1.743	P = 0.2854
	Residual	5.236	4	1.309
	Track ratio analysis, Figure 2-figure supplement 3B
