# Supplementary material for: Presynaptic morphology and vesicular composition determine vesicle dynamics in mouse central synapses
Source: eLife. 2017 Apr 22;6:e24845. doi: 10.7554/eLife.24845 (PMC5423771; doi:10.7554/eLife.24845)
Supplement: Figure 3—source data 1. — DOI: http://dx.doi.org/10.7554/eLife.24845.023 [file elife-24845-fig3-data1.xlsx]

## Sheet: Figure 3E
		Q655 (Auto)	Q655 (Brownian)
	hn1	0.0271	0.0093
	hn2	0.0352	0.014
	hn3	0.0074	0.0088
	hn4	0.0196	0.0091
	hn5	0.0093	0.0075
	hn6	0.0373	0.0029
	hn7	0.0276	0.0146
	hn8	0.0221	0.0101
	hn9	0.0263	0.0099
	mean	0.0235444	0.00957778
	sd	0.0102649	0.00344557
	sem	0.00342163	0.00114852
	Q655 autoregressive versus Brownian, Two-tailed unpaired t-test
	p		0.0012
	t		3.9177
	df		16
	sed		0.004
			**
	Diffusion coefficient analysis, Figure 3E
