# Supplementary material for: Presynaptic morphology and vesicular composition determine vesicle dynamics in mouse central synapses
Source: eLife. 2017 Apr 22;6:e24845. doi: 10.7554/eLife.24845 (PMC5423771; doi:10.7554/eLife.24845)
Supplement: Figure 4—source data 1. — DOI: http://dx.doi.org/10.7554/eLife.24845.025 [file elife-24845-fig4-data1.xlsx]

## Sheet: Figure 4D
		Immature (S)	Mature (S)	Immature (M)	Mature (M)	Immature (L)	Mature (L)
	cc1	30.8	72.1	38	22.4	31.2	5.5
	cc2	31.7	81.6	49.7	9.3	18.6	9.1
	cc3	25.4	71.3	44.5	1.4	30.1	27.3
	cc4	32.1	69.5	42.6	25.4	25.3	5.1
	cc5	30.5	63.4	42.5	25.3	27	11.3
	cc6	33.2	74.6	49.3	17.3	17.5	8.1
	cc7	43.3	80.2	22.9	17.2	33.8	2.6
	cc8	35.2	73.1	30.7	20	34.1	6.9
	cc9	24.1	75.9	34.1	13.9	41.8	10.2
	mean	31.8111	73.5222	39.3667	16.9111	28.8222	9.56667
	sd	5.57684	5.50495	8.8596	7.82567	7.71974	7.17966
	sem	1.85895	1.83498	2.9532	2.60856	2.57325	2.39322
	Immature versus Mature, Two-tailed unpaired t-test
	p		<0.0001		<0.0001		<0.0001
	t		16.0288		5.7092		5.4879
	df		16		16		16
	sed		2.602		3.932		3.51
			***		***		***
	Track ratio analysis, Figure 4D (right panel)

## Sheet: Figure 4E
		Immature (Passive)	Mature (Passive)	Immature (Active)	Mature (Active)
	cc1	60.2	78.5	39.8	21.5
	cc2	69.3	82.3	30.7	17.7
	cc3	75.1	88.1	24.9	11.9
	cc4	66.8	74.5	33.2	25.5
	cc5	75.8	85.1	24.2	14.9
	cc6	78.5	77.6	21.5	22.4
	cc7	72.2	84.8	27.8	15.2
	cc8	67.4	79.9	32.6	20.1
	cc9	74.7	82.6	25.3	17.4
	mean	71.1111	81.4889	28.8889	18.5111
	sd	5.71455	4.25777	5.71455	4.25777
	sem	1.90485	1.41926	1.90485	1.41926
	Immature versus Mature, Two-tailed unpaired t-test
	p		0.0005		0.0005
	t		4.376		4.376
	df		16		16
	sed		2.372		2.372
			***		***
	Displacement modality analysis, Figure 4E (left panel)
		Immature	Mature
	cc1	0.0641	0.0633
	cc2	0.0785	0.0481
	cc3	0.0495	0.0466
	cc4	0.0503	0.0333
	cc5	0.0798	0.0672
	cc6	0.0803	0.0538
	cc7	0.0824	0.0496
	cc8	0.0882	0.0578
	cc9	0.0771	0.0509
	mean	0.0722444	0.0522889
	sd	0.0141757	0.00997427
	sem	0.00472523	0.00332476
	Immature versus Mature, Two-tailed unpaired t-test
	p		0.0031
	t		3.4826
	df		16
	sed		0.006
			**
	Diffusion coefficient analysis, Figure 4E (right panel)
