# Supplementary material for: Presynaptic morphology and vesicular composition determine vesicle dynamics in mouse central synapses
Source: eLife. 2017 Apr 22;6:e24845. doi: 10.7554/eLife.24845 (PMC5423771; doi:10.7554/eLife.24845)
Supplement: Figure 4—source data 2. — DOI: http://dx.doi.org/10.7554/eLife.24845.026 [file elife-24845-fig4-data2.xlsx]

## Sheet: Figure 4-S1D
		Stage1	Stage2	Stage3	Stage4
	cc1	0.0655	0.0728	0.0725	0.0539		ANOVA summary
	cc2	0.0588	0.0799	0.0683	0.0576		Two-way ANOVA	Ordinary
	cc3	0.0641	0.0602	0.0776	0.0548		Alpha	0.05
	cc4	0.0672	0.084	0.0714	0.0571
	cc5	0.0545	0.0771	0.0631	0.0501		Source of Variation	% of total variation	P value	P value summary	Significant?
	mean	0.06202	0.0748	0.07058	0.0547		Row Factor	9.048	0.387	ns	No
	sd	0.00524852	0.00912551	0.00535696	0.00299917		Column Factor	66.98	0.0009	***	Yes
	sem	0.0023536	0.00409216	0.00240222	0.00134492
	Stage1 versus stage2, 3, 4, Two-tailed unpaired t-test						ANOVA table	SS	DF	MS	F (DFn, DFd)	P value
	p		0.0267	0.0343	0.0268		Row Factor	0.0001628	4	4.07e-05	F (4, 12) = 1.133	P = 0.3870
	t		2.7093	2.5484	2.7059		Column Factor	0.001205	3	0.0004017	F (3, 12) = 11.18	P = 0.0009
	df		8	8	8		Residual	0.0004313	12	3.594e-05
	sed		0.005	0.003	0.003
			*	*	*
	Stage2 versus stage1, 3, 4, Two-tailed unpaired t-test
	p	0.0267		0.3921	0.0016
	t	2.7093		0.9047	4.6702
	df	8		8	8
	sed	0.005		0.005	0.004
		*		ns	**
	Stage3 versus stage1, 2, 4, Two-tailed unpaired t-test
	p	0.0343	0.3921		0.0004
	t	2.5484	0.9047		5.7772
	df	8	8		8
	sed	0.003	0.005		0.003
		*	ns		***
	Stage4 versus stage1, 2, 3, Two-tailed unpaired t-test
	p	0.0268	0.0016	0.0004
	t	2.7059	4.6702	5.7772
	df	8	8	8
	sed	0.003	0.004	0.003
		*	**	***
	Diffusion coefficient analysis, Figure 4-figure supplement 1D
