# Supplementary material for: Presynaptic morphology and vesicular composition determine vesicle dynamics in mouse central synapses
Source: eLife. 2017 Apr 22;6:e24845. doi: 10.7554/eLife.24845 (PMC5423771; doi:10.7554/eLife.24845)
Supplement: Figure 5—source data 1. — DOI: http://dx.doi.org/10.7554/eLife.24845.029 [file elife-24845-fig5-data1.xlsx]

## Sheet: Figure 5C
		Vglut1	Vglut2
	cc1	0.55	0.87
	cc2	0.61	0.29
	cc3	0.53	0.58
	cc4	0.47	0.69
	cc5	0.33	0.38
	cc6	0.74	0.54
	mean	0.538333	0.558333
	sd	0.137174	0.209324
	sem	0.0559893	0.0854385
	Vglut1 versus Vglut2, Two-tailed unpaired t-test
	p		0.8364
	t		0.212
	df		10
	sed		0.094
			ns
	Fluorescence intensity analysis, Figure 5C

## Sheet: Figure 5F
		Vglut1 (S)	Vglut2 (S)	Vglut1 (M)	Vglut2 (M)	Vglut1 (L)	Vglut2 (L)
	cc1	61.5	67.6	27.5	26.5	11	5.9
	cc2	60.9	67.9	26.5	26.6	12.6	5.5
	cc3	66.2	68.7	23	25.2	10.8	6.1
	cc4	64.5	66.9	23.9	27.5	11.6	5.6
	cc5	58.3	62.1	31.3	32	10.4	5.9
	cc6	57.8	67.4	31.3	26.4	10.9	6.2
	mean	61.5333	66.7667	27.25	27.3667	11.2167	5.86667
	sd	3.32786	2.36277	3.54161	2.38551	0.780812	0.273252
	sem	1.35831	0.964395	1.25145	0.842937	0.275905	0.0965555
	Vglut1 versus Vglut2, Two-tailed unpaired t-test
	p		0.0102		0.9432		<0.0001
	t		3.1572		0.073		18.798
	df		10		10		10
	sed		1.657		1.506		0.285
			*		ns		***
	Track ratio analysis, Figure 5F (right panel)

## Sheet: Figure 5G
		Vglut1 (Diffusive)	Vglut2 (Diffusive)	Vglut1 (Active)	Vglut2 (Active)
	cc1	72.5	82.3	27.5	17.7
	cc2	67.2	86.1	32.8	13.9
	cc3	71.1	79.9	28.9	20.1
	cc4	68.9	81.5	31.1	18.5
	cc5	73.8	81.8	26.2	18.2
	cc6	72.6	78.9	27.4	21.1
	mean	71.0167	81.75	28.9833	18.25
	sd	2.51031	2.48334	2.51031	2.48334
	sem	1.02462	1.01361	0.887036	0.877507
	Vglut1 versus Vglut2, Two-tailed unpaired t-test
	p		<0.0001		<0.0001
	t		7.482		8.671
	df		10		10
	sed		1.435		1.237
			***		***
	Displacement modality analysis, Figure 5G (left panel)
		Vglut1	Vglut2
	cc1	0.06256	0.06015
	cc2	0.07932	0.02662
	cc3	0.05588	0.0539
	cc4	0.07524	0.02517
	cc5	0.08853	0.0664
	cc6	0.06924	0.02807
	mean	0.071795	0.043385
	sd	0.0117784	0.0188081
	sem	0.00480751	0.00767677
	Vglut1 versus Vglut2, Two-tailed unpaired t-test
	p		0.0102
	t		3.1595
	df		10
	sed		0.009
			*
	Diffusion coefficient analysis, Figure 5G (right panel)
