# Supplementary material for: Presynaptic morphology and vesicular composition determine vesicle dynamics in mouse central synapses
Source: eLife. 2017 Apr 22;6:e24845. doi: 10.7554/eLife.24845 (PMC5423771; doi:10.7554/eLife.24845)
Supplement: Figure 7—source data 1. — DOI: http://dx.doi.org/10.7554/eLife.24845.036 [file elife-24845-fig7-data1.xlsx]

## Sheet: Figure 7D
		Ctrl (S)	KCl (S)	Suc (S)	1 Hz (S)	Ctrl (M)	KCl (M)	Suc (M)	1 Hz (M)	Ctrl (L)	KCl (L)	Suc (L)	1 Hz (L)
	cc1	73.9	69.5	76.3	70.5	16.6	26.2	15.3	19.4	9.5	4.3	8.4	10.1
	cc2	68.9	73.3	78.6	63.2	20.9	21.1	13.7	29.2	10.2	5.6	7.7	7.6
	cc3	75.1	70.9	71.2	78.1	17.1	22.2	18.6	13.8	7.8	6.9	10.2	8.1
	cc4	67.5	66.9	69.4	73.1	23.6	29.5	22.5	18.3	8.9	3.6	8.1	8.6
	cc5	72.8	72.3	72.5	69.8	17.3	25.1	19.3	22.3	9.9	2.6	8.2	7.9
	cc6	74.9	70.6	77.4	71.1	13.9	24.7	14.4	20.3	11.2	4.7	8.2	8.6
	mean	72.1833	70.5833	74.2333	70.9667	18.2333	24.8	17.3	20.55	9.58333	4.61667	8.46667	8.48333
	sd	3.22268	2.24358	3.71304	4.84465	3.45002	2.98664	3.40881	5.09696	1.16175	1.50919	0.880152	0.884119
	sem	1.31538	1.00609	1.51553	1.97741	1.40817	1.3393	1.39135	2.08039	0.474184	0.676769	0.359246	0.360865
	Control versus KCl, sucrose and 1 Hz stimulation, Two-tailed unpaired t-test
	p		0.3545	0.0663	0.6173		0.0067	0.6416	0.3766		<0.0001	0.0878	0.0928
	t		0.9708	2.061	0.5157		3.4023	0.48	0.9253		6.0727	1.8918	1.858
	df		10	10	10		10	10	10		10	10	10
	sed		1.648	1.999	2.366		1.931	1.938	2.507		0.818	0.592	0.592
			ns	ns	ns		**	ns	ns		***	ns	ns
	Track ratio analysis, Figure 7D

## Sheet: Figure 7E
		Ctrl (Diffusive)	KCl (Diffusive)	Suc (Diffusive)	1 Hz (Diffusive)	Ctrl (Active)	KCl (Active)	Suc (Active)	1 Hz (Active)
	cc1	88.1	92.1	95.3	82.6	11.9	7.9	4.7	17.4
	cc2	89.8	87.5	94.2	78.1	10.2	12.5	5.8	21.9
	cc3	84.2	90.9	93.3	79.3	15.8	9.1	6.7	20.7
	cc4	80.2	78.8	95.8	86.1	19.8	21.2	4.2	13.9
	cc5	83.6	91.3	94.3	84.2	16.4	8.7	5.7	15.8
	cc6	89.1	89.1	89.6	81.9	10.9	10.9	10.4	18.1
	mean	85.8333	88.2833	93.75	82.0333	14.1667	11.7167	6.25	17.9667
	sd	3.76652	4.93413	2.21517	2.98373	3.76652	4.93413	2.21517	2.98373
	sem	1.53735	2.01393	0.904153	1.21785	1.53735	2.01393	0.904153	1.21785
	Control versus KCl, sucrose and 1 Hz stimulation, Two-tailed unpaired t-test
	p		0.355	0.0012	0.08		0.355	0.0012	0.08
	t		0.9699	4.4618	1.9481		0.9699	4.451	1.9481
	df		10	10	10		10	10	10
	sed		2.526	1.775	1.951		2.526	1.775	1.951
			ns	**	ns		ns	**	ns
	Displacement modality analysis, Figure 7E

## Sheet: Figure 7F
		Ctrl	KCl	Suc	1 Hz
	cc1	0.051	0.0226	0.0612	0.0471
	cc2	0.0755	0.0187	0.0551	0.0644
	cc3	0.0581	0.0265	0.0425	0.0496
	cc4	0.0493	0.0278	0.0606	0.0506
	cc5	0.0532	0.0126	0.0572	0.0402
	cc6	0.0645	0.0231	0.0438	0.0654
	mean	0.0586	0.0218833	0.0534	0.0528833
	sd	0.00994062	0.00556109	0.00825809	0.00999608
	sem	0.0040574	0.00226983	0.00337065	0.00408003
	Control versus KCl, sucrose and 1 Hz stimulation, Two-tailed unpaired t-test
	p		<0.0001	0.3396	0.3294
	t		8.0612	1.0028	1.0253
	df		10	10	10
	sed		0.005	0.005	0.006
			***	ns	ns
	Diffusion coefficient analysis, Figure 7F
