# Supplementary material for: Presynaptic morphology and vesicular composition determine vesicle dynamics in mouse central synapses
Source: eLife. 2017 Apr 22;6:e24845. doi: 10.7554/eLife.24845 (PMC5423771; doi:10.7554/eLife.24845)
Supplement: Figure 7—source data 2. — DOI: http://dx.doi.org/10.7554/eLife.24845.037 [file elife-24845-fig7-data2.xlsx]

## Sheet: Figure 7-S1C
		Spontaneous	1 Hz
	cc1	0.0531	0.0488
	cc2	0.0459	0.0394
	cc3	0.0574	0.0563
	mean	0.0521333	0.0481667
	sd	0.00581062	0.00846778
	sem	0.00335874	0.00489467
	Spontaneous versus 1 Hz loading, Two-tailed unpaired t-test
	p		0.5271
	t		0.6919
	df		4
	sed		0.006
			ns
	Diffusion coefficient analysis, Figure 7-figure supplement 1C
