# Supplementary material for: Presynaptic morphology and vesicular composition determine vesicle dynamics in mouse central synapses
Source: eLife. 2017 Apr 22;6:e24845. doi: 10.7554/eLife.24845 (PMC5423771; doi:10.7554/eLife.24845)
Supplement: Figure 8—source data 1. — DOI: http://dx.doi.org/10.7554/eLife.24845.040 [file elife-24845-fig8-data1.xlsx]

## Sheet: Figure 8C
		Ctrl Near AZ	1 Hz Near AZ	Ctrl Away AZ	1 Hz Away AZ
	cc1	31.9	40	68.1	60
	cc2	20.6	37.7	79.4	62.3
	cc3	25.9	43.5	74.1	56.5
	mean	26.13	40.4	73.87	59.6
	sd	5.654	2.921	5.654	2.921
	sem	3.264	1.686	3.264	1.686
	Control versus 1 Hz stimulation, Two-tailed unpaired t-test
	p		0.0178		0.0178
	t		3.883		3.883
	df		4		4
			*		*
	Track ratio at AZ analysis, Figure 8C

## Sheet: Figure 8D
		Ctrl inside AZ	1 Hz inside AZ	Ctrl outside AZ	1 Hz outside AZ
	cc1	0.0094	0.0231	0.0368	0.0394
	cc2	0.0235	0.0054	0.047	0.0448
	cc3	0.037	0.0409	0.0492	0.042
	cc4	0.0539	0.0392	0.0546	0.0313
	cc5	0.0116	0.0128	0.0398	0.0486
	cc6			0.0346	0.0139
	mean	0.02708	0.02428	0.04367	0.03667
	sd	0.01859	0.01572	0.007818	0.01258
	sem	0.008315	0.00703	0.003192	0.005137
	Control versus 1 Hz stimulation, Two-tailed unpaired t-test
	p		0.8036		0.274
	t		0.2572		1.158
	df		8		10
			ns		ns
	Inside versus outside AZ, Two-tailed unpaired t-test
	p			0.0766	0.1798
	t			2	1.455
	df			9	9
				ns	ns
	Diffusion coefficient analysis, Figure 8D
