# Supplementary material for: Presynaptic morphology and vesicular composition determine vesicle dynamics in mouse central synapses
Source: eLife journal article supplement (doi:10.7554/elife.24845), 2017-04-22
Supplement: supp [file elife_poa_e24845_Figure_6_source_Data_1.xlsx]

## Sheet: Figure 6E
		Ctrl (S)	Noco (S)	Ctrl (M)	Noco (M)	Ctrl (L)	Noco (L)
	cc1	65.5	72.1	22.3	22.8	12.2	5.1
	cc2	57.8	78.6	27.6	18.6	14.6	2.8
	cc3	63.7	79.4	26.2	17.7	10.1	2.9
	cc4	58.7	68.9	25.9	26.2	15.4	4.9
	cc5	61.5	72.5	26.7	22.2	11.8	5.3
	cc6	63.1	64.8	25.7	32.6	11.2	2.6
	cc7	69.6	63.2	19.6	31.7	10.8	5.1
	cc8	71.9	72.8	16.5	22	11.6	5.2
	mean	63.975	71.5375	23.8125	24.225	12.2125	4.2375
	sd	4.92363	5.8113	3.96068	5.54482	1.84734	1.22584
	sem	1.7398	2.05346	1.39953	1.9593	0.652772	0.433158
	Control versus Nocodazole, Two-tailed unpaired t-test
	p		0.0138		0.8665		<0.0001
	t		2.8153		0.1712		10.2392
	df		14		14		14
	sed		2.689		2.395		0.779
			*		ns		***
	Track ratio analysis, Figure 6F (right panel)

## Sheet: Figure 6G
		Ctrl	Noco
	cc1	0.08497	0.06965
	cc2	0.08399	0.06841
	cc3	0.08594	0.07088
	cc4	0.05127	0.04296
	cc5	0.04908	0.0419
	cc6	0.05346	0.04422
	cc7	0.06038	0.05878
	cc8	0.06253	0.06147
	mean	0.0664525	0.0572837
	sd	0.0159625	0.0125005
	sem	0.00532082	0.00416682
	Control versus Nocodazole, Two-tailed unpaired t-test
	p		0.1914
	t		1.373
	df		14
	sed		0.007
			ns
	Diffusion coefficient analysis, Figure 6G
